# Supplementary material for: Mitochondrial genome sequence of Phytophthora sansomeana and comparative analysis of Phytophthora mitochondrial genomes
Source: PLoS One. 2020 May 14;15(5):e0231296. doi: 10.1371/journal.pone.0231296 (PMC7224479; doi:10.1371/journal.pone.0231296)
Supplement: S1 Table — (XLSX) [file pone.0231296.s001.xlsx]

## Sheet: Sheet1
Table S1. tRNA genes in the mitochondrial genomes of 10 Phytophthora species
			Nucleotide location ina
tRNA #	Amino Acid	Anticodon	P. infestans	P. infestans	P. infestans	P. infestans	Pandina	Pandina	P. ipomoeae	P mirabilis	P. phaseoli	P. nicotianae	P. sojae	P. polonica	P. ramorum	P. sansomeana
			AY894835	U17009	AY898627	AY898628	HM590419	KJ408269	HM590420	HM590421	HM590418	KY851301	DQ832717	KT946958	DQ832718	HM936679
1	Asn	GUU	2686..2757	2686..2757	2686..2757	2686..2757	2686..2757	2686..2757	2686..2757	2684..2755	2686..2757	2686..2757	2673..2744	36571..36642	2657..2728	2737..2808
2	Ser	GCU	2770..2858	2770..2858	2770..2858	2770..2858	2770..2858	2770..2858	2770..2858	2768..2856	2770..2858	2770..2858	2757..2845	36655..36743	2740..2828	2820..2908
3	Met	CAU	2879..2950	2879..2950	2879..2950	2879..2950	2879..2950	2879..2950	2879..2950	2877..2948	2879..2950	2879..2950	2866..2937	36756..36827	2842..2913	2922..2993
4	Pro	UGG	2994..3068	2994..3068	2994..3068	2994..3068	2994..3068	2994..3068	2994..3068	2992..3066	2994..3068	2996..3070	2982..3056	36836..36910	2940..3014	3019..3093
5	Met	CAU	3082..3153	3082..3153	3082..3153	3082..3153	3082..3153	3082..3153	3082..3153	3080..3151	3082..3153	3084..3155	3070..3142	36914..36986	3028..3100	3107..3179
6	Gly	GCC	4090..4161	4090..4161	4090..4161	4090..4161	4090..4161	4090..4161	4090..4161	4088..4159	4090..4161	4092..4163	4082..4153	37923..37994	4032..4103	4114..4185
7	Gly	UCC	4253..4324	4253..4324	4253..4324	4253..4324	4253..4324	4253..4324	4253..4324	4251..4322	4253..4324	4265..4336	4250..4321	38084..38155	4204..4275	4283..4354
8	Tyr	GUA	4330..4413	4330..4413	4330..4413	4330..4413	4330..4413	4330..4413	4330..4413	4328..4411	4330..4413	4350..4433	4348..4431	38162..38245	4290..4373	4362..4445
9	Trp	CCA	6736..6807	6736..6807	8615..8686	8621..8692	6731..6802	6731..6802	6724..6795	6746..6817	6747..6818	6295..6366	6818..6889	40338..40409	6142..6213	6916..6987
10	Glu	UUC	14217..14146	14253..14182	16164..16093	16135..16064	14187..14116	14194..14123*	14208..14137	14177..14106	14223..14152	20147..20218	22708..22779	16060..16131	21647..21718	21607..21678
11	His	GUG	15816..15745	15852..15781	17763..17692	17734..17663	15786..15715	15793..15722*	15807..15736	15776..15705	15822..15751	18549..18620	21099..21170	14462..14533	20052..20123	20010..20081
12	Phe	GAA	19055..19128	19091..19164	21002..21075	20973..21046	19023..19096	19030..19103	19044..19117	19015..19088	19059..19132	15310..15237	17570..17497	11221..11148	16785..16712	16742..16669
13	Arg	GCG	19478..19551	19514..19587	21425..21498	21396..21469	19446..19519	19453..19526	19467..19540	19438..19511	19482..19555	14887..14814	17148..17075	10804..10731	16362..16289	16319..16246
14	Gln	UUG	19562..19633	19598..19669	21509..21580	21480..21551	19530..19601	19537..19608	19551..19622	19522..19593	19566..19637	14803..14732	17060..16989	10723..10652	16274..16203	16231..16160
15	Ile	GAU	19635..19708	19671..19744	21582..21655	21553..21626	19603..19676	19610..19683	19624..19697	19595..19668	19639..19712	14730..14657	16986..16913	10650..10577	16201..16128	16158..16085
16	Val	UAC	19711..19783	19747..19819	21658..21730	21629..21701	19679..19751	19686..19758	19700..19772	19671..19743	19715..19787	14654..14582	16909..16837	10573..10501	16124..16052	16081..16009
17	Asp	GUC	22334..22407	22370..22443	24281..24354	24252..24325	22302..22375	22309..22382	22322..22395	22294..22367	22338..22411	12036..11963	14261..14188	7976..7903	13468..13395	13456..13383
18	Arg	UCU	25791..25863	25827..25899	27739..27811	27709..27781	25747..25819	25753..25825	25769..25841	25651..25723	25804..25876	25486..25558	28237..28309	21548..21620	26262..26334	23442..23370
19	Leu	UAG	29484..29402	29520..29438	31432..31350	31402..31320	29438..29356	29445..29363*	29438..29356	29342..29260	29478..29396	29158..29076	34415..34333	25443..25361	30799..30717	31124..31042
20	Leu	UAA	29577..29494	29613..29530	31525..31442	31495..31412	29531..29448	29538..29455*	29531..29448	29435..29352*	29571..29488	29252..29169	34508..34425	25535..25452	30892..30809	31217..31134
21	Cys	GCA	30535..30605	30570..30640	32483..32553	32453..32523	30486..30556	30496..30566	30486..30556	30390..30460	30526..30596	30226..30296	35499..35569	26495..26565	31864..31934	32188..32258
22	Ser	UGA	30701..30617	30736..30652	32649..32565	32619..32535	30652..30568	30662..30578*	30652..30568	30556..30472	30692..30608	30392..30308	35659..35575	26653..26569	32023..31939	32348..32264
23	Ile	CAUc	33853..33926	33889..33962	35802..35875	35772..35845	33804..33877	33815..33888	33804..33877	33708..33781	33843..33916	33554..33627	38836..38909	29816..29889	35185..35258	35532..35605
24	Lys	UUU	35075..35147	35111..35183	37024..37096	36994..37066	35027..35099	35037..35109	35027..35099	34931..35003	35066..35138	34796..34868	40100..40172	31044..31116	36418..36490	36764..36836
25	Ala	UGC	35151..35223	35187..35259	37100..37172	37070..37142	35103..35175	35113..35185	35103..35175	35007..35079	35142..35214	34872..34944	40175..40247	31119..31191	36493..36565	36839..36911
26b	Arg	UCU													10600..10528
a Those followed by an asterisk are based on analysis in this study and are in reverse-complement strand comparing to GenBank annotations. b This tRNA only exists in P. ramorum and is an inverted repeat of tRNA #18. c The cytosine in the anticodon is inferred to be post-transcriptionally modified to lysidine that would enable it to recognize codon AUA for isoleucine.
